# Supplementary material for: Pseudomonas syringae effector HopZ3 suppresses the bacterial AvrPto1–tomato PTO immune complex via acetylation
Source: PubMed Central journal article supplement (PMC8584673; doi:10.1371/journal.ppat.1010017), 2021-11-01
Supplement: ppat.1010017.s002.pdf [file ppat.1010017.s002.pdf]

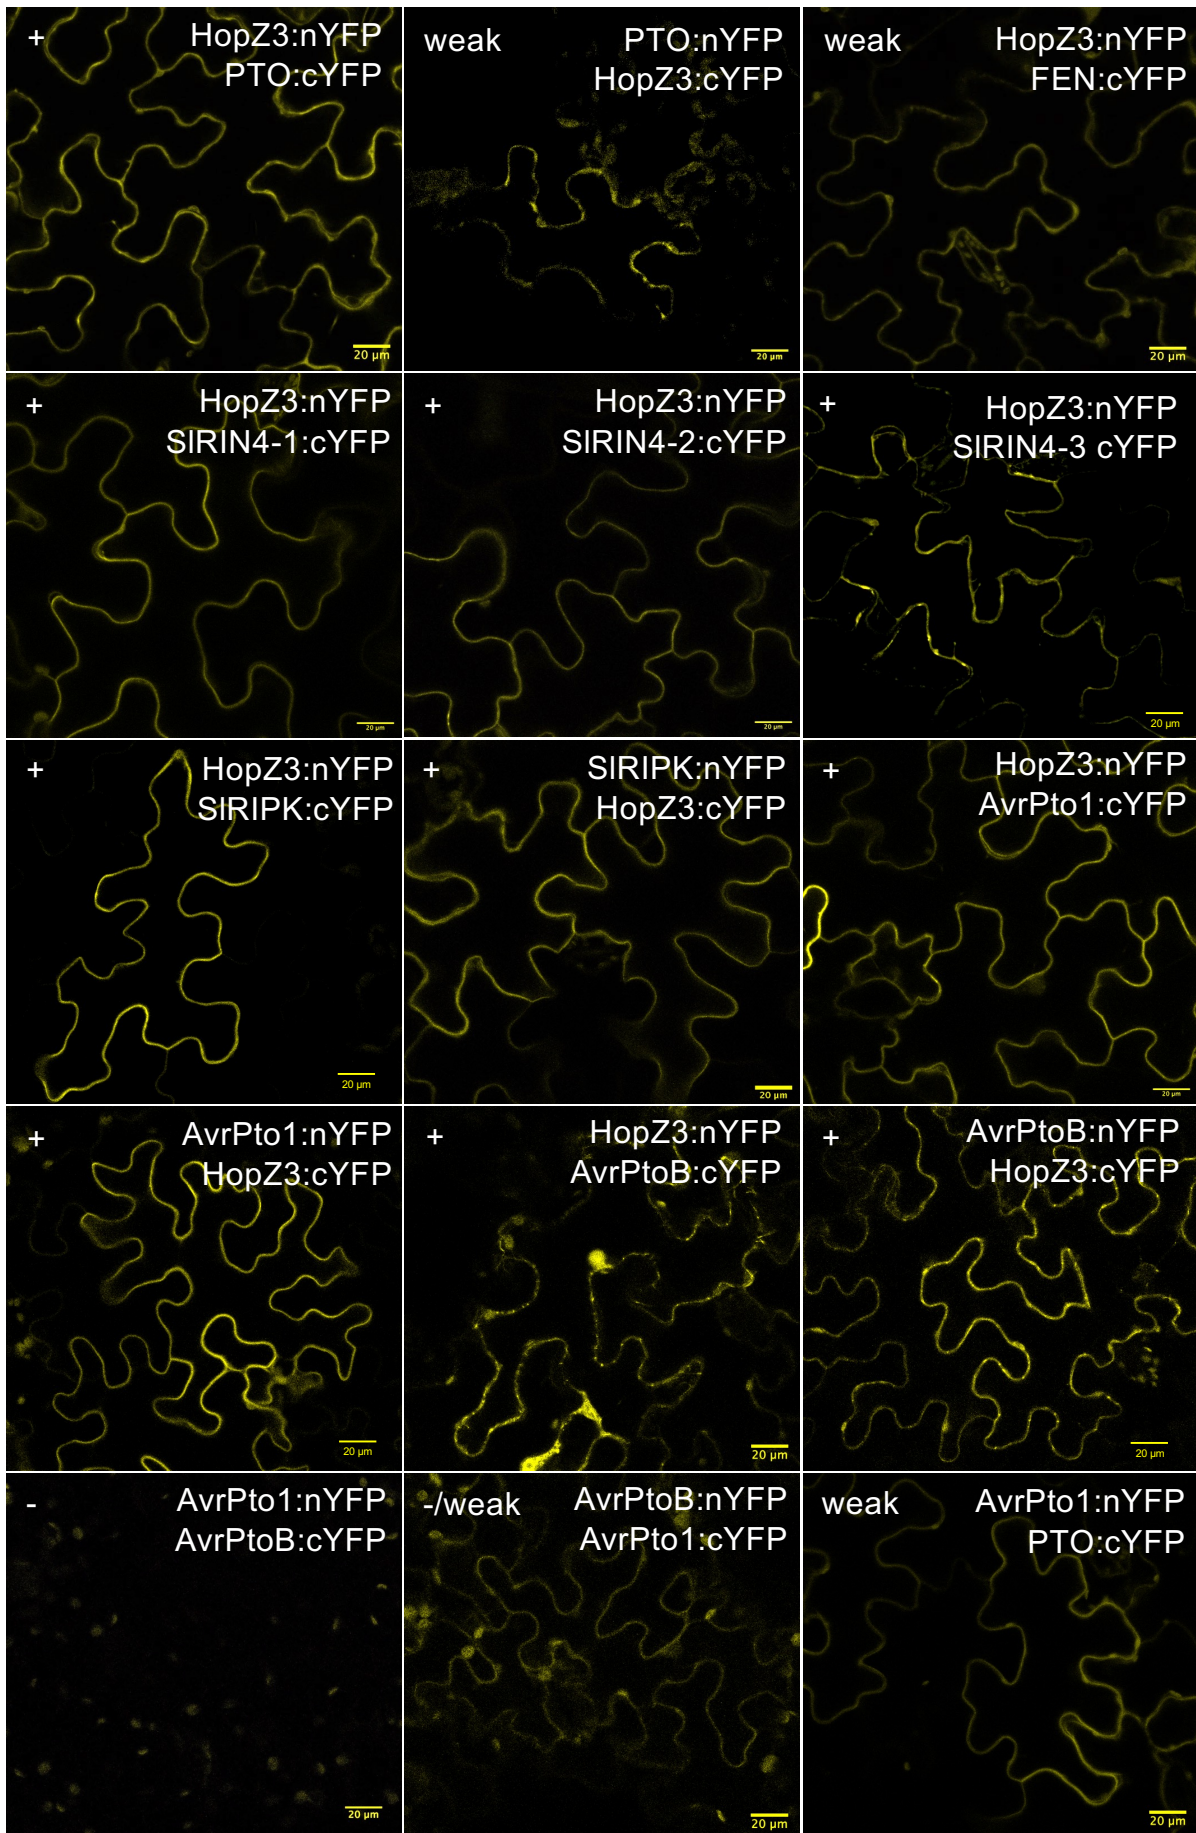

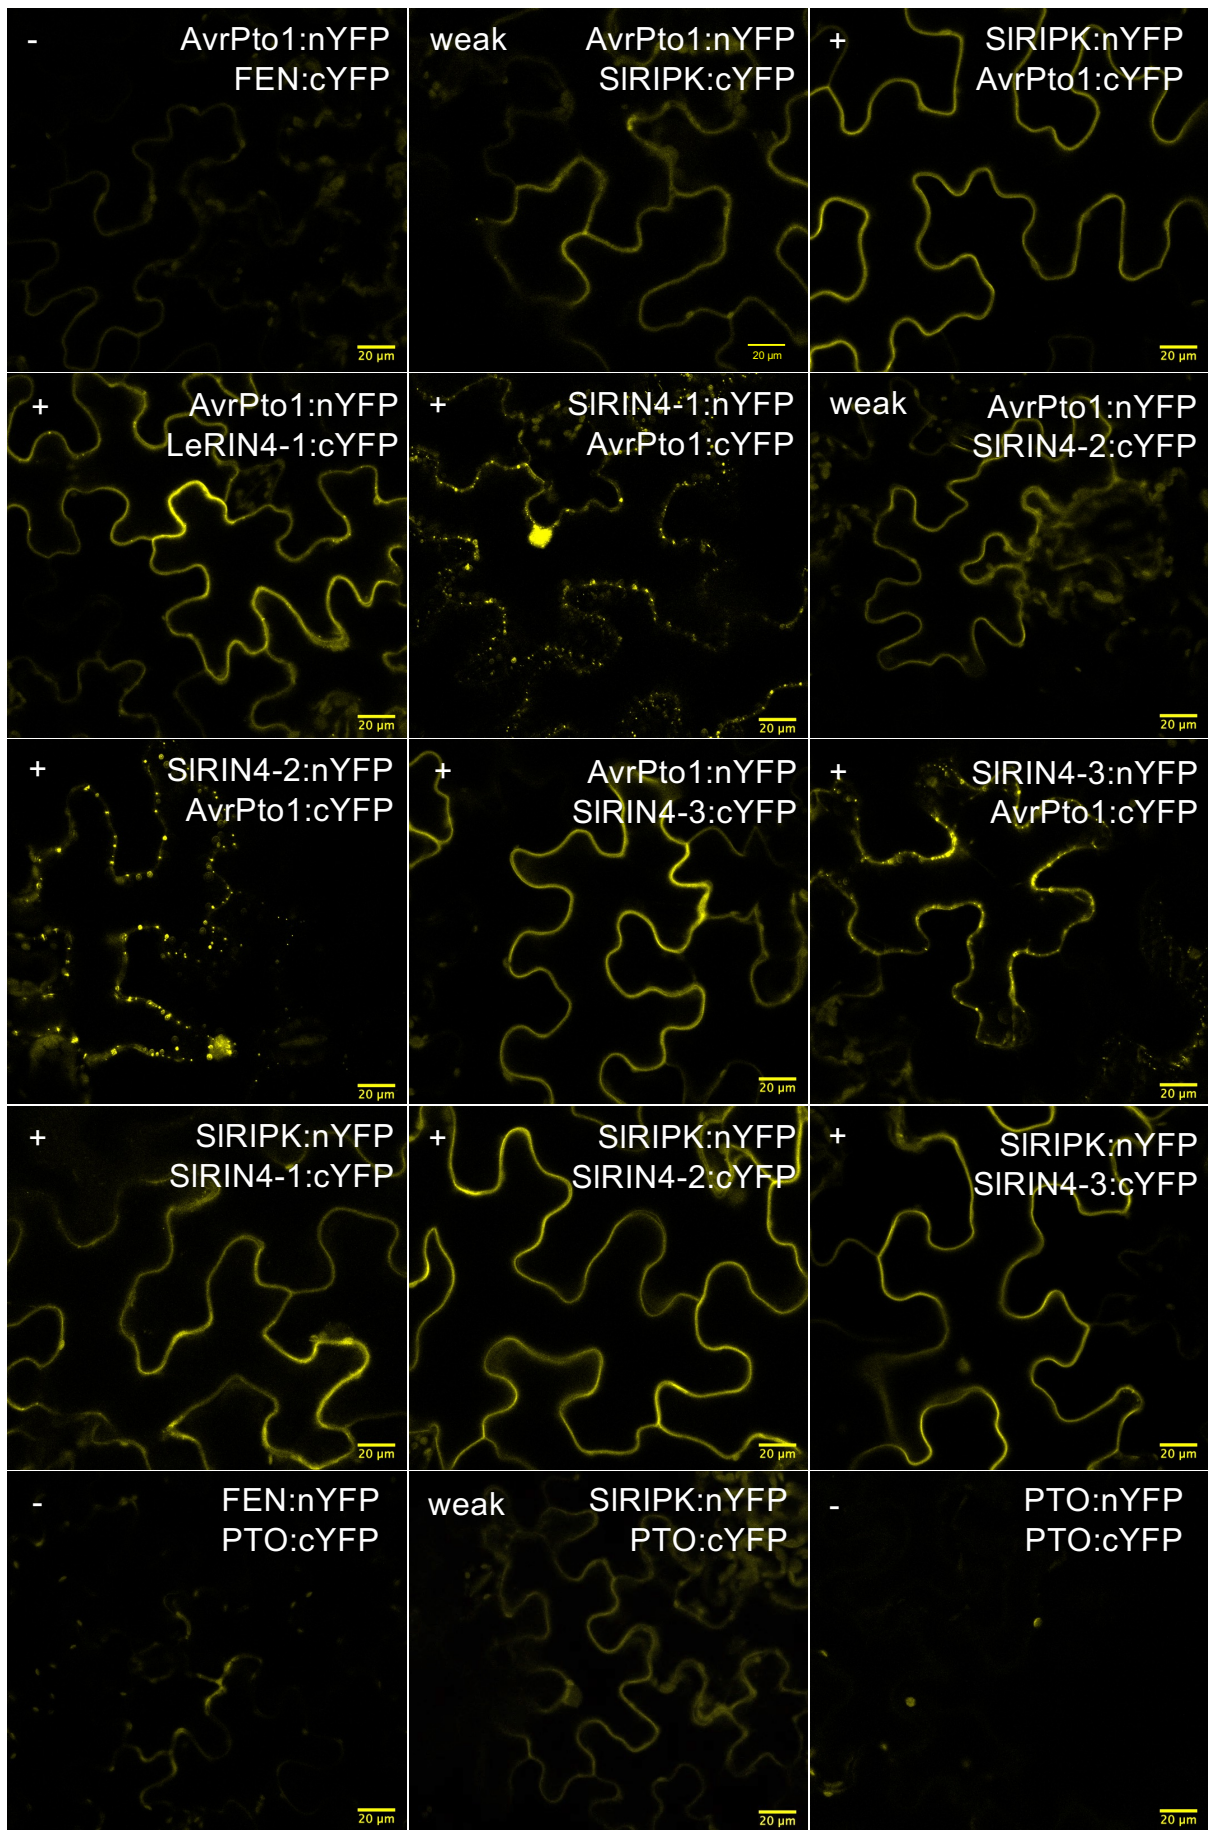

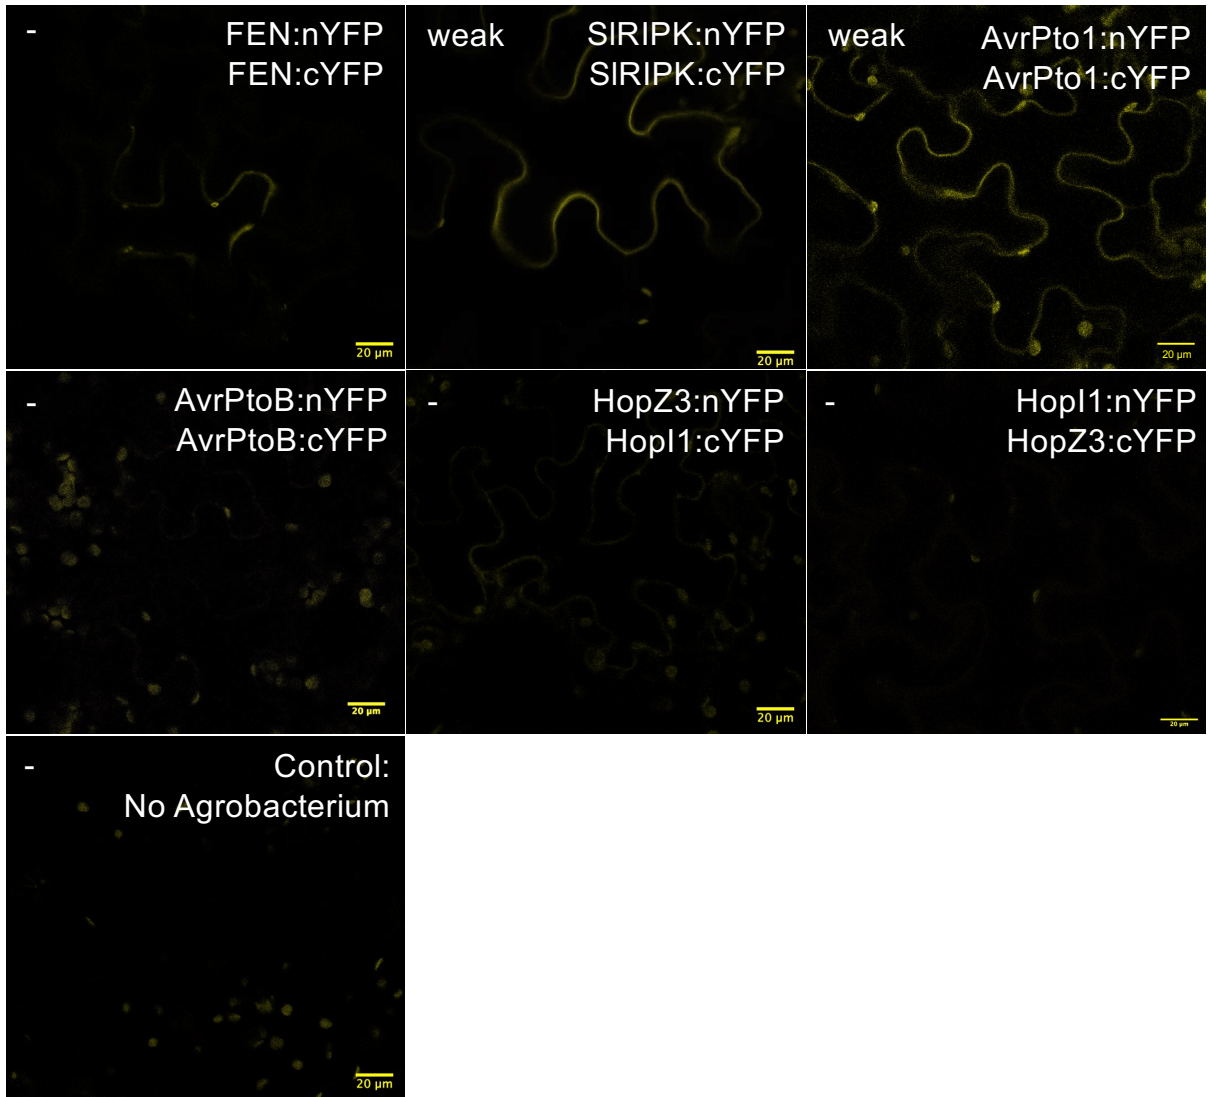

**S2 Fig. Interaction between HopZ3, AvrPto1<sub>PSY</sub> and their potential interactors in *planta*.** Interactions of HopZ3, AvrPto1<sub>PSY</sub>, AvrPtoB<sub>PSY</sub>, PTO, FEN, SIRIPK, SIRIN4-1, -2 and -3 were tested by BiFC. YFP fluorescence was imaged by confocal microscopy in epidermal *N. benthamiana* cells co-infiltrated with mixtures of Agrobacteria harboring expression plasmids pG005 (protein:nYFP fusions) and pG006 (protein:cYFP fusions). Bar = 20 µm. Schematic overview of a subset of tested combinations is represented in Table 1. +, fluorescence detected; -, fluorescence not detected; weak, weak signal, as determined from images of several experimental samples.
