# Supplementary material for: Pseudomonas syringae effector HopZ3 suppresses the bacterial AvrPto1–tomato PTO immune complex via acetylation
Source: PubMed Central journal article supplement (PMC8584673; doi:10.1371/journal.ppat.1010017), 2021-11-01
Supplement: ppat.1010017.s003.pdf [file ppat.1010017.s003.pdf]

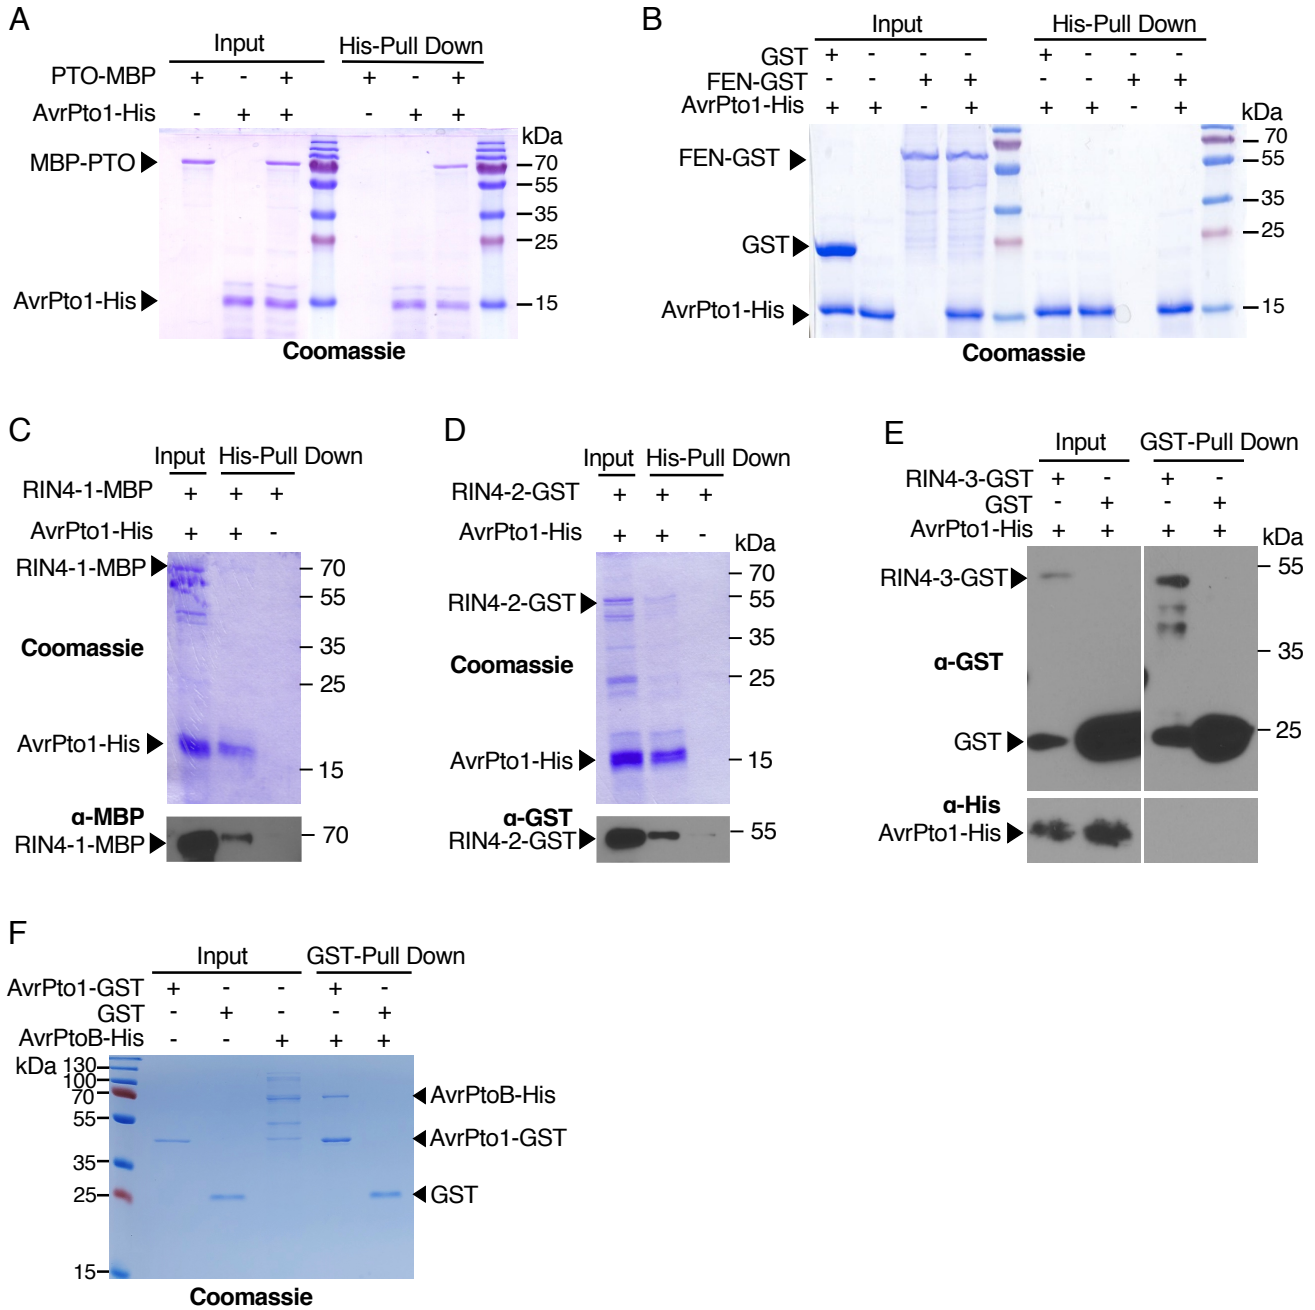

**S3 Fig. Pull downs with recombinant tagged proteins to assess interaction between AvrPto1<sub>PSy</sub> and proteins in the PTO immune pathway.** Empty Ni<sup>2+</sup> resin or immobilized GST were used as negative controls for His- and GST pull downs, respectively. Proteins were detected by Coomassie staining or immunoblotting. (A) Immobilized His-tagged AvrPto1<sub>PSy</sub> pulled down purified PTO-MBP. (B) Immobilized AvrPto1<sub>PSy</sub>-His was incubated with FEN-GST, showing no interaction. (C) Immobilized His-tagged AvrPto1<sub>PSy</sub> was incubated with SIRIN4-1-MBP showing weak interaction in 1 experiment and no interaction in 2 experiments. (D) Immobilized His-tagged AvrPto1<sub>PSy</sub> was incubated with SIRIN4-2-GST showing weak interaction in 2 of 3 experiments. (E) Immobilized His-tagged AvrPto1<sub>PSy</sub> was incubated with SIRIN4-3-GST. Interaction was not detected. (F) Immobilized GST-AvrPto1<sub>PSy</sub> or GST was mixed with His-tagged AvrPtoB<sub>PSy</sub>, showing that the two effectors interact.
