# Supplementary material for: Pseudomonas syringae effector HopZ3 suppresses the bacterial AvrPto1–tomato PTO immune complex via acetylation
Source: PubMed Central journal article supplement (PMC8584673; doi:10.1371/journal.ppat.1010017), 2021-11-01
Supplement: ppat.1010017.s004.pdf [file ppat.1010017.s004.pdf]

# AvrPto1

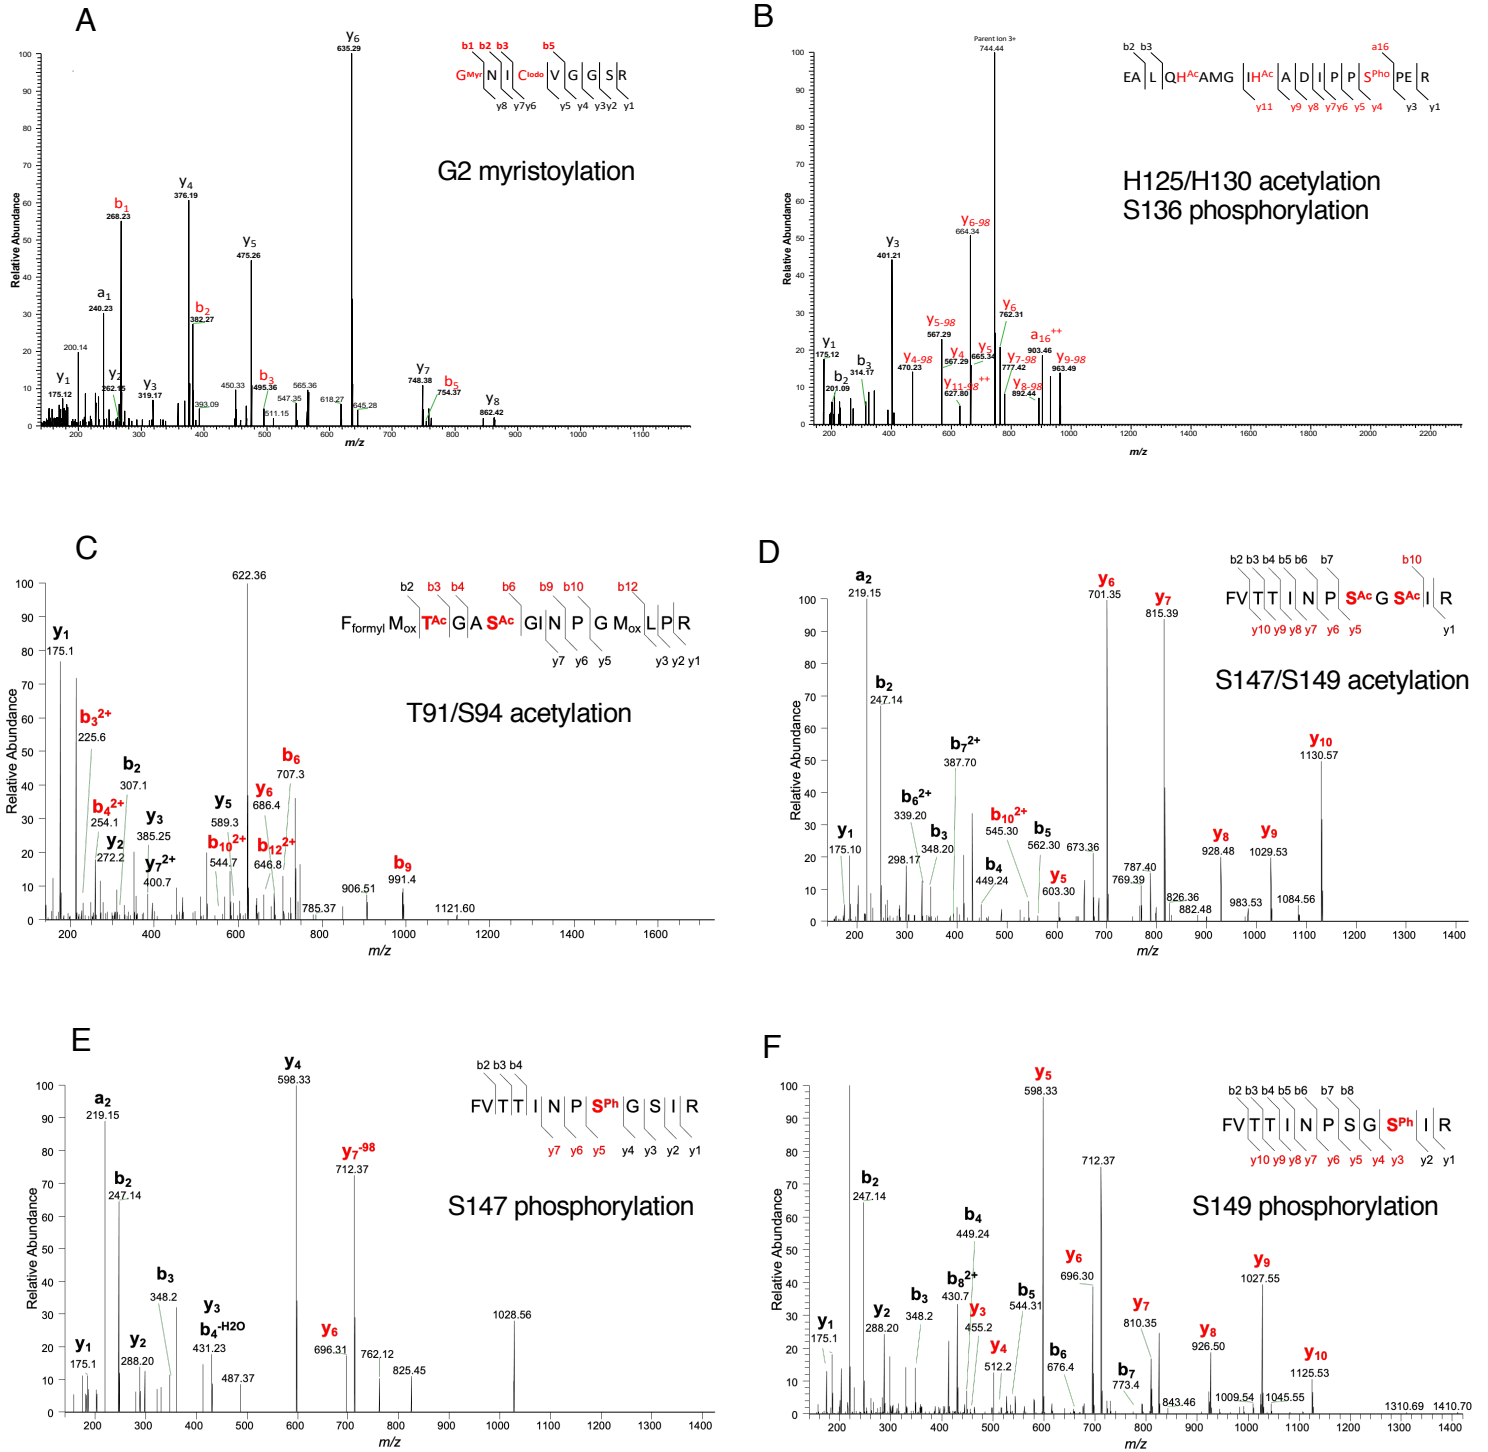

**S4 Fig. HopZ3 acetylates multiple sites in AvrPto1<sub>PSY</sub> important for interaction with PTO and signaling.** MS/MS spectra show PTM of AvrPto1<sub>PSY</sub> expressed in *N. benthamiana* in the presence of HopZ3 or HopZ3\_C300A. (A) Evidence of G2 myristoylation. (B) Acetylation of H125 and H130 in the presence of HopZ3. S136 was phosphorylated in both samples (HopZ3 and HopZ3\_C300A). (C) Acetylation of T91 and S94 observed in the presence of HopZ3. (D-F) Acetylation of S147 and S149 in the presence of HopZ3 (D) reduced phosphorylation of these residues. Phosphorylation was observed in the presence of HopZ3\_C300A (E-F).
