# Supplementary material for: Pseudomonas syringae effector HopZ3 suppresses the bacterial AvrPto1–tomato PTO immune complex via acetylation
Source: PubMed Central journal article supplement (PMC8584673; doi:10.1371/journal.ppat.1010017), 2021-11-01
Supplement: ppat.1010017.s005.pdf [file ppat.1010017.s005.pdf]

# PTO

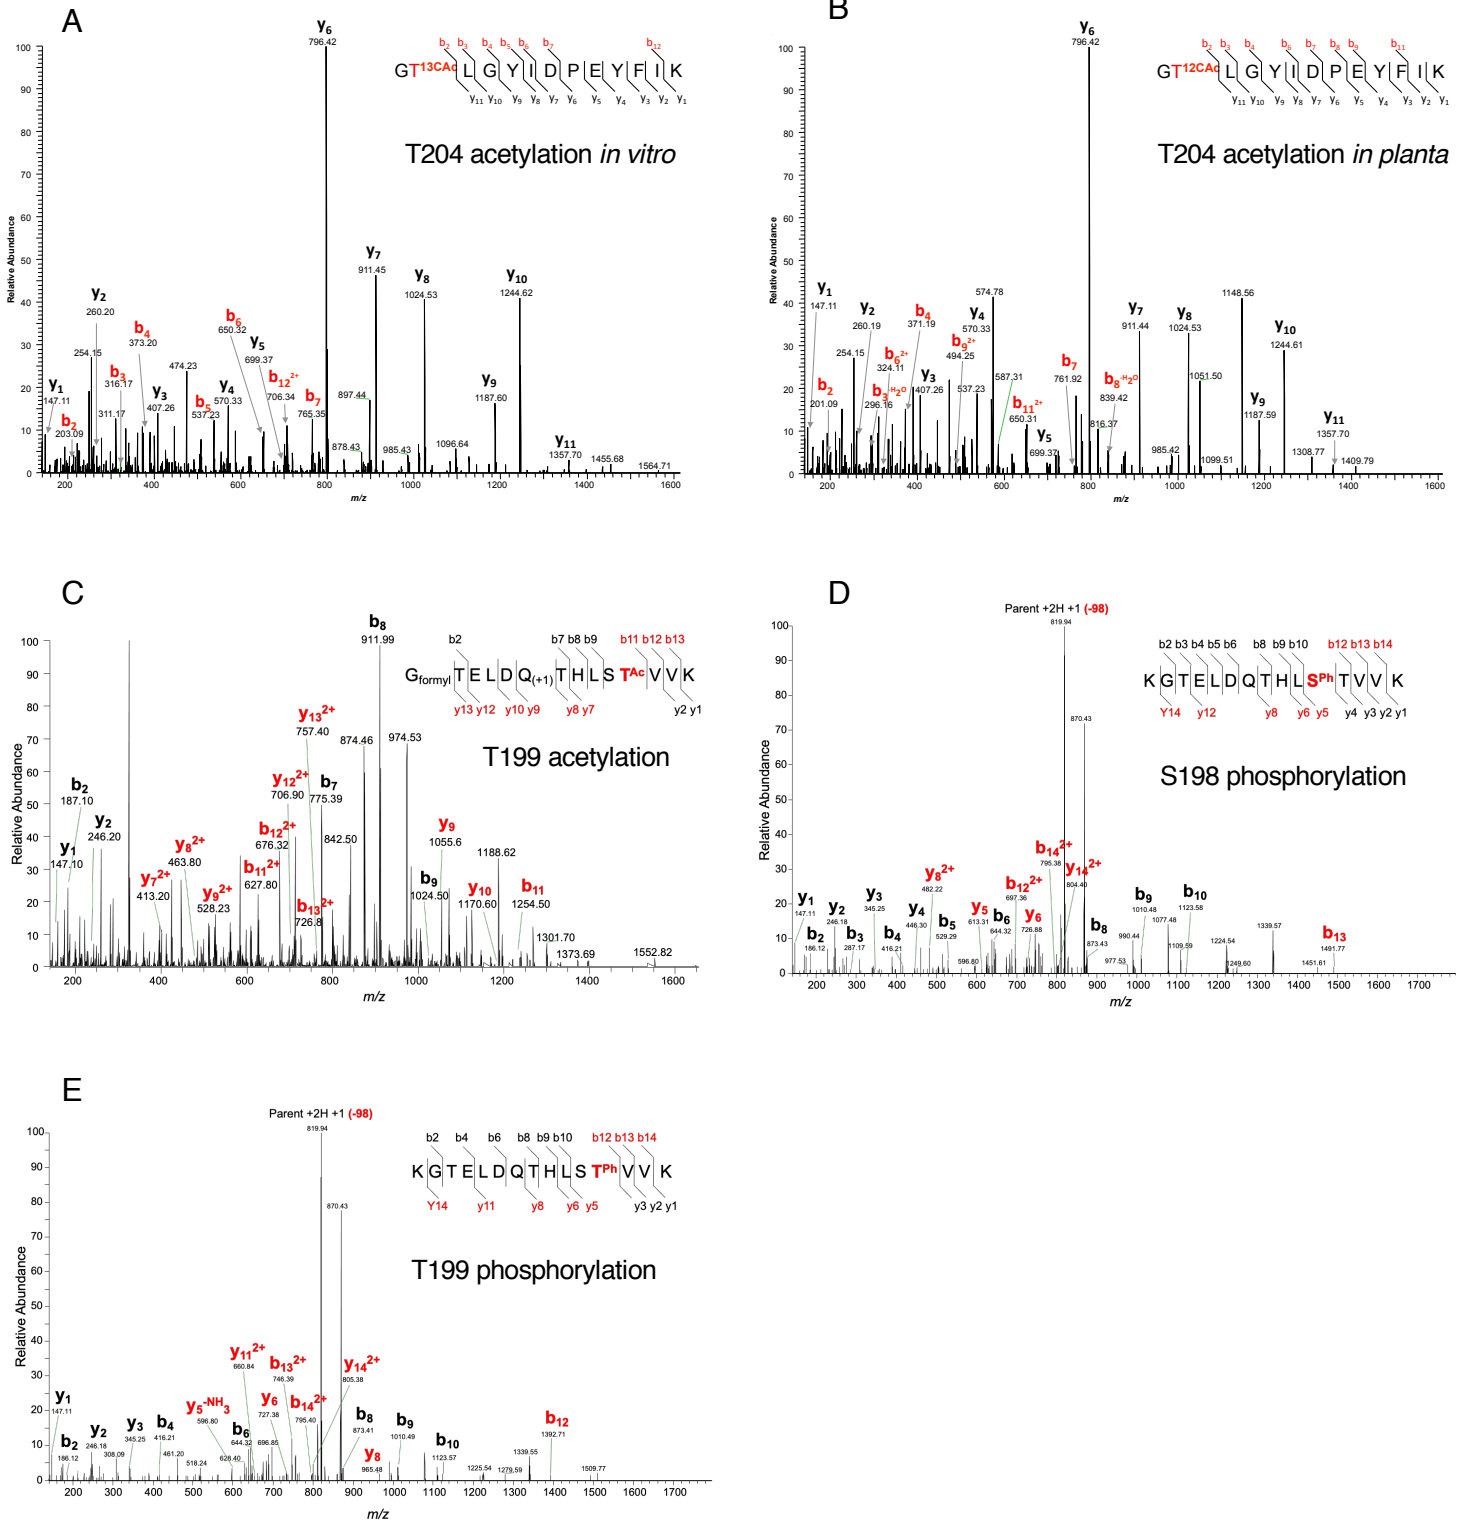

**S5 Fig. HopZ3 acetylates key sites in the activation loop of PTO.** PTMs were analyzed using mass spectrometry for PTO after *in vitro* acetylation reaction (A) or co-expressed with HopZ3 or HopZ3\_C300A *in N. benthamiana* (B-E). (A-B) In both *in vitro* (A) and *in planta* (B) analyses T204, a key residue in the activation loop of the PTO kinase, was acetylated in the presence of HopZ3. (C) T199 acetylation in the presence of HopZ3. (D-E) Phosphorylation of S198 and T199 in the presence of HopZ3\_C300A.
