# Supplementary material for: Pseudomonas syringae effector HopZ3 suppresses the bacterial AvrPto1–tomato PTO immune complex via acetylation
Source: PubMed Central journal article supplement (PMC8584673; doi:10.1371/journal.ppat.1010017), 2021-11-01
Supplement: ppat.1010017.s006.pdf [file ppat.1010017.s006.pdf]

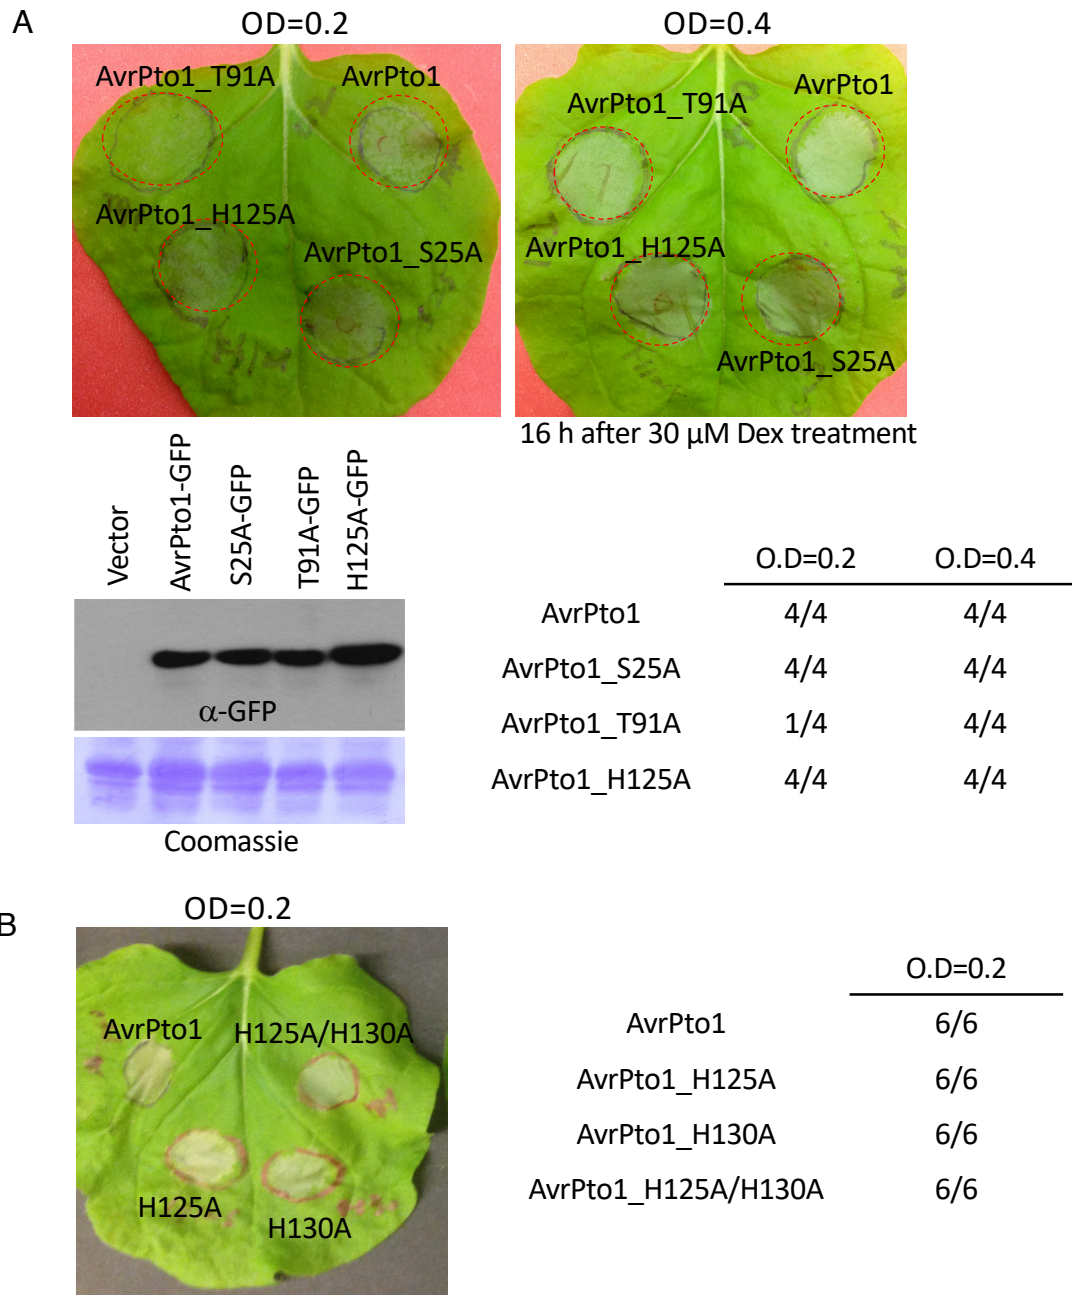

**S6 Fig. Effect of mutations of AvrPto1<sub>PSy</sub> acetylation sites on cell death induction in *N. benthamiana*.** AvrPto1<sub>PSy</sub>-GFP variants were transiently expressed in *N. benthamiana* infiltrated with *Agrobacterium* at OD=0.2 or 0.4 and sprayed with dexamethasone. (A) Only AvrPto1<sub>PSy</sub>-T91A induced delayed cell death compared to wild-type AvrPto1<sub>PSy</sub>. All variants were expressed to similar levels. A number of infiltrated areas with cell death per total number of samples is shown in tables. (B) H125, H130 and double mutant of AvrPto1<sub>PSy</sub> induced cell death in *N. benthamiana*.
