# Supplementary material for: Pseudomonas syringae effector HopZ3 suppresses the bacterial AvrPto1–tomato PTO immune complex via acetylation
Source: PubMed Central journal article supplement (PMC8584673; doi:10.1371/journal.ppat.1010017), 2021-11-01
Supplement: ppat.1010017.s007.pdf [file ppat.1010017.s007.pdf]

```

4_1 MAR-PNVPKFGNWENDNTPTYTVYFEKARQTRGT-GKMMNPNDPE-----EN----- 45
4_2 MAR-ANVPKFGNWGNEDNTPTYTVVFENARKNRG--GKMINPNDPQ-----EN----- 44
4_3 MAKHSQVPKFGWESEDEDVQYTTYFENAAKGKK--GSKMNPNDPQYLEAKVKGENGTDTV 58
AT MAR-SNVPKFGNWEAEENVPTAYFDKARKTRAPGSKIMNPNDPE-----YN----- 46
** : .:*****:* : : . ** . * : * : : . . :*****: *
4_1 -----PDMFRNLAPPEVAPQSKPKRQ-----TEEPPI 73
4_2 -----PDMF-----PNVAPSSRPKTP-----PTEEPM 66
4_3 RQKPERIASRDDVELRKSTGSPMHPDTMG-----HKVPTYPSQORHGAKYGGNKSESETM 113
AT -----SDSQSQAPPHP-----SSRTKP 64
. . . * :
. . . * :
4_1 GRGGPARQTRDHLRSKEDGEFRQYANS PARKESVGRKGANEP SHQR----GRGSNSGRITG 129
4_2 G-METARQTNKRRVSKEDGDFR--ASSPARNEPT-----THQRHGG----GRGSNSGRPS 114
4_3 KSTEILTPRHERRPSREEGYLRKPTDSPLRNENMGR RTPMESPHHRYGGLSGGATPKRAS 173
AT EQVDTVRRSREHMRSREESSELKQFGDAGG-----SSNEAANKR-----QGRAS 107
. . : * : . : : . : . :
. . : * : . : : . : . :
4_1 RQSIGSEHSFDKSPLHPHYQAKVSNAGRGVASPAWEGKN-----NSYDSSHGTPG 179
4_2 RQSGSDHSIAKSPLHPNSQAKIS--GRVAASPVWEGKNLYDSSHGTPGRSFESSHATPG 172
4_3 QQSVGPDRSIEHSPLHPHSHGRPGGKGGVVSSPSWERKASSE-----GSHGLAPSTPG 226
AT QNNSYDN---KSPLHKNSYDGTG-----KSRPK 132
. . : : * : * : . :
. . : * : * : . :
4_1 RSKVK-----QDKSDRGA AVPRFGEWDENDPQSADNYTHIFNKFREEKQGNPSGTPS--- 231
4_2 RHQMK-----QESPDRGTVVVPKFGGWDNDPQDAENYTEVFNKVVREQRHVD TGNMPAAGV 227
4_3 RSRLRPVAKGDDTPDDSPAVPKFGDWDENDPASAEGYTQIFNKVREEKQTGSAKVPSSST 286
AT PTNLR---ADESPEKVTVVVPKFGDWDENNPSSADGYTHIFNKVREERSSSGANVSGSSRT 188
. . : : . . : . . * : * : * : * : * : * : * : * : * : * : * : * : * : * :
4_1 RTSNNT-QKHNSSEKQRKWCCCPW--- 254
4_2 RTSYST-QRQORNEKQKSCCFPLW--- 250
4_3 DTSYSNSQKRYGNDSGKGLCFPWGRS 313
AT PTHQSS---RNPNTS-SCCCFGFGGK 211
* . . : : : :

```

**S7 Fig. Alignment of tomato RIN4s (4\_1, 4\_2, 4\_3) and Arabidopsis RIN4 (AT).** Modifications in SlRIN4s were determined *in vitro*, modifications in AtRIN4 are from [1] (*in vitro* and *in planta*). Residues acetylated by HopZ3 are bold and highlighted in yellow; phosphorylation sites are underlined; known phosphorylation sites important for signaling (S141, T166) in AtRIN4 [2] are highlighted blue; residues phosphorylated by RIPK in AtRIN4 (T21, S160, T166) [3] are circled in red. \* (asterisk) - fully conserved residues, : (colon) - conservation between groups of strongly similar properties, . (period) - conservation between groups of weakly similar properties.

**References**

1. Lee J, Manning AJ, Wolfgeher D, Jelenska J, Cavanaugh KA, Xu H, et al. Acetylation of an NB-LRR plant immune-effector complex suppresses immunity. *Cell Rep.* 2015;13(8):1670-82. doi: 10.1016/j.celrep.2015.10.029. PubMed PMID: 26586425.
2. Chung EH, El-Kasmi F, He Y, Loehr A, Dangl JL. A plant phosphoswitch platform repeatedly targeted by type III effector proteins regulates the output of both tiers of plant immune receptors. *Cell Host & Microbe.* 2014;16(4):484-94. doi: 10.1016/j.chom.2014.09.004. PubMed PMID: 25299334.
3. Liu J, Elmore JM, Lin ZJ, Coaker G. A receptor-like cytoplasmic kinase phosphorylates the host target RIN4, leading to the activation of a plant innate immune receptor. *Cell Host & Microbe.* 2011;9(2):137-46. doi: 10.1016/j.chom.2011.01.010. PubMed PMID: 21320696.
