# Supplementary material for: Pseudomonas syringae effector HopZ3 suppresses the bacterial AvrPto1–tomato PTO immune complex via acetylation
Source: PubMed Central journal article supplement (PMC8584673; doi:10.1371/journal.ppat.1010017), 2021-11-01
Supplement: ppat.1010017.s008.pdf [file ppat.1010017.s008.pdf]

SLRIPK MATCG-IDWKS<sup>S</sup>VLPNCFK<sup>G</sup>GNVNRSEAKVMEN<sup>S</sup>K----QMNSD<sup>HH</sup>R<sup>L</sup>A<sup>F</sup>S<sup>D</sup>I<sup>S</sup>T<sup>D</sup>S<sup>R</sup>S<sup>V</sup>L<sup>I</sup> 55  
 AtRIPK MAVKKK<sup>V</sup>SW<sup>R</sup>S<sup>L</sup>I<sup>V</sup>G<sup>C</sup>L<sup>G</sup>D<sup>P</sup>E<sup>T</sup>L<sup>M</sup>A<sup>S</sup>S<sup>K</sup>K<sup>P</sup>K<sup>R</sup>K<sup>N</sup>D<sup>V</sup>I<sup>K</sup>K<sup>Q</sup>S<sup>S</sup>F<sup>Q</sup>R<sup>L</sup>S<sup>I</sup>L<sup>D</sup>M<sup>S</sup>N<sup>P</sup>S<sup>S</sup>N<sup>T</sup>L<sup>S</sup> 60  
 \*. .:.\*:\*. .\*: . :. : \* : :\*...\*:\*: \*:\* . \* ..\*  
 SLRIPK SLDDLSSNAVIGSNLHVFTYEELKLI<sup>TS</sup>DFSSANFLGKGGFGPVHKGFIDDKIKPGLDAQ 115  
 AtRIPK --EDLS-ISLAGSDLHVFTLAE<sup>L</sup>KVIT<sup>Q</sup>S<sup>F</sup>S<sup>S</sup>T<sup>N</sup>FLGEGGFGPVHKGFIDDKLRPGLKAO 117  
 :\*\*\* :: \*\*:\*\*\*\*\* \*\*\*:\*\*..\*\*:\*:\*\*\*:\*\*\*\*\*:\*\*\*\*\*:\*\*\*\*\*:\*\*\*\*\*:\*\*\*.\*  
 SLRIPK PVAV<sup>K</sup>LLDLDGNQ<sup>GH</sup>QEWL<sup>T</sup>EVVFLGQLRHHHLV<sup>K</sup>LIGYCWEEEQRLLVYEY<sup>M</sup>MARGNLED 175  
 AtRIPK PVAV<sup>K</sup>LLDLEGLQGHREW<sup>L</sup>TEVMFLGQLKHKNLV<sup>K</sup>LIGYCCEEEH<sup>R</sup>TLVYEFMP<sup>R</sup>G<sup>S</sup>LEN 177  
 \*\*\*\*\*:\* \*\*\*:\*\*\*\*\*:\*\*\*\*\*:\*\*\*:\*\*\*\*\* \*\*\*: \* \*\*\*\*\*:\* \*\*:\* \*\*:  
 SLRIPK QLF<sup>S</sup>RY<sup>S</sup>SCLPWLTRIKIMVGAAGLAFLHGEEKPVIYRDFK<sup>S</sup>NILLDSYRAK<sup>L</sup>SDFG 235  
 AtRIPK QLF<sup>R</sup>RY<sup>S</sup>ASLPWSTRMKIAHGAAT<sup>G</sup>LQFLHEAENPVIYRDFK<sup>S</sup>NILLDSY<sup>T</sup>AKLSDFG 237  
 \*\*\* \*\*\*: .\*\*\* \*\*:\* \*\* \* \*\* \* \*\* \* \* :\*\*\*\*\*:\*\*\*\*\*:\*\*\*\*\*:\*\*\*\*\*  
 SLRIPK LAKDGPEGDD<sup>TH</sup>STRVMG<sup>TH</sup>GYAAPEYIM<sup>T</sup>GHLTSKSDVYSFGVVLLELITGRRAMD<sup>K</sup> 295  
 AtRIPK LAKDGPEGDD<sup>TH</sup>STRVMG<sup>T</sup>QGYAAPEYIM<sup>T</sup>GHLTARSDVYSFGVVLLELLTGRRSV<sup>D</sup>DK 297  
 \*\*\*\*\*:\*\*\*\*\*:\*\*\*\*\*:\*\*\*\*\*:\*\*\*\*\*:\*\*\*\*\*:\*\*\*\*\*:\*\*\*\*\*:\*\*\*  
 SLRIPK RPLKERILVDWARPMLRDPHKLDRIMDPRL<sup>E</sup>GOY<sup>S</sup>TQGA<sup>K</sup>VAAALAYQCLSHH<sup>P</sup>RSRPT<sup>M</sup> 355  
 AtRIPK RSSREQLVDWARPMLNDPRKLSRIMDPRL<sup>E</sup>GOY<sup>S</sup>ETGARKAATLAYQCLSHR<sup>P</sup>KNRPCM 357  
 \* . :\*: \*\*\*\*\*.\*:\*. \*\*\*\*\* \*\*:\*.\*:\*\*\*\*\*:\*. \*\* \*  
 SLRIPK SNIVKILEPVLDMKDIPMGPFVYVVP<sup>S</sup>SKPDKG<sup>T</sup>EIGELK<sup>T</sup>KVNDENKAGVRENEVDNAG 415  
 AtRIPK SAVVSILNDLKDYNDIPMGTFY<sup>T</sup>YTPN-TPDNKEDDGRVGNKPRKSSHHHHHQ<sup>Q</sup>QSNHP 416  
 \* :\*.\*\*: : \* :\*\*\*\*\*.\*.\*. \*\* : : \* . : . \* ..... : : : : . \*  
 SLRIPK ENREDGNAKQRRVGHRYKHRLKTDASVY<sup>S</sup>D<sup>T</sup>HLYHK<sup>T</sup>VKHERTNKLNSY 464  
 AtRIPK RSSP<sup>S</sup>PTTK<sup>S</sup>PSP-TAK<sup>S</sup>PRNSTENHRRTL<sup>R</sup>NGVNS<sup>S</sup>PLR<sup>S</sup>EAGGERY-- 462  
 .. . .:\*. . \* .\*: : : :...: \* .:

**S8 Fig. HopZ3 acetylates SIRIPK residues important for activity.** Modifications in SIRIPK were determined *in vitro*, modifications in AtRIPK are from [1] (*in vitro* and *in planta*). Residues acetylated by HopZ3 are bold and highlighted in yellow; phosphorylation sites are underlined; known sites in AtRIPK important for activity (K122; S251/T252 which correspond to S198/T199 in PTO) [1] are circled in red; sites corresponding to T204 in PTO are circled in blue. \* (asterisk) - fully conserved residues, : (colon) - conservation between groups of strongly similar properties, . (period) - conservation between groups of weakly similar properties.

## References

1. Lee J, Manning AJ, Wolfgeher D, Jelenska J, Cavanaugh KA, Xu H, et al. Acetylation of an NB-LRR plant immune-effector complex suppresses immunity. *Cell Rep.* 2015;13(8):1670-82. doi: 10.1016/j.celrep.2015.10.029. PubMed PMID: 26586425.
