# Supplementary material for: Pseudomonas syringae effector HopZ3 suppresses the bacterial AvrPto1–tomato PTO immune complex via acetylation
Source: PubMed Central journal article supplement (PMC8584673; doi:10.1371/journal.ppat.1010017), 2021-11-01
Supplement: ppat.1010017.s009.pdf [file ppat.1010017.s009.pdf]

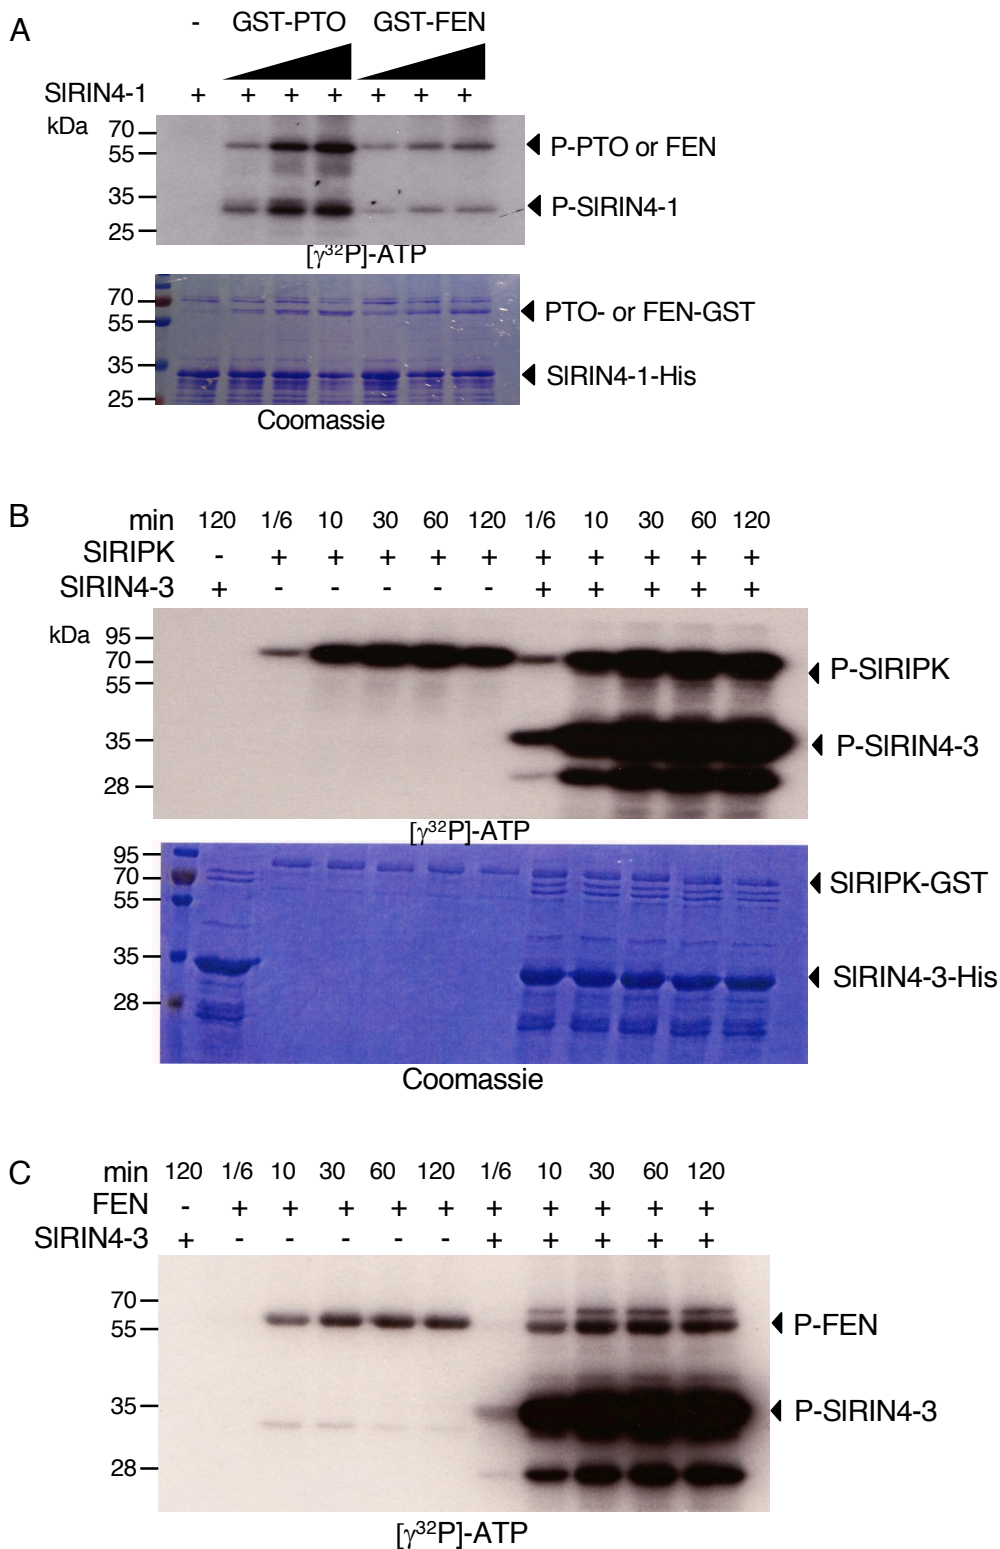

**S9 Fig. Kinases in the PTO family can phosphorylate tomato RIN4s.** (A) PTO and FEN phosphorylate tomato SIRIN4-1. Kinase assays showing an increasing amount of PTO and FEN autophosphorylation and transphosphorylation of SIRIN4-1. (B-C) SIRIPK and FEN phosphorylate SIRIN4-3. The time course of the *in vitro* kinase reactions is shown. Purified SIRIPK (B) or FEN (C) were incubated in kinase buffer with or without SIRIN4-3 as a substrate. At indicated time points, aliquots of the reaction were taken out and separated by SDS-PAGE.
