# Supplementary material for: Pseudomonas syringae effector HopZ3 suppresses the bacterial AvrPto1–tomato PTO immune complex via acetylation
Source: PubMed Central journal article supplement (PMC8584673; doi:10.1371/journal.ppat.1010017), 2021-11-01
Supplement: ppat.1010017.s011.pdf [file ppat.1010017.s011.pdf]

**S2 Table. PTO PTMs *in vitro* and *in planta*.**

| Site        | <i>In vitro</i> |      | <i>In planta</i> |       |       |       |
|-------------|-----------------|------|------------------|-------|-------|-------|
|             | Ac Z3/CA        | Phos | Ac Z3/CA         |       | Phos  |       |
|             |                 |      | exp 1            | exp 2 | exp 1 | exp 2 |
| T9*         |                 |      | Z3               | 1.8   |       |       |
| S11*        |                 |      | Z3               | 2     |       |       |
| <b>T38</b>  |                 | +    |                  |       | +     |       |
| K123        |                 |      | Z3               | Z3#   |       |       |
| T133        |                 | +    |                  |       | +     | +     |
| S135        |                 |      |                  |       | +     | +     |
| S137        |                 |      |                  |       | +     | +     |
| T181        |                 |      |                  |       | +     |       |
| T190        |                 |      |                  |       | +     | +     |
| T195        |                 | +    |                  |       | +     |       |
| <b>S198</b> |                 | +    |                  |       | +     | +     |
| <b>T199</b> |                 | +    | Z3               | Z3#   | +     |       |
| K202        |                 |      | Z3               | 1     |       |       |
| <b>T204</b> | Z3              |      | Z3#              | Z3#   |       |       |

PTMs were determined either *in vitro*, using purified recombinant PTO after <sup>13</sup>C-acetylation by HopZ3/HopZ3\_C300A, or *in planta*, by co-expressing PTO and HopZ3/HopZ3\_C300A in *N. benthamiana*, followed by immunoprecipitation. Numbers indicate enrichment (fold change) of acetylation in the presence of HopZ3 vs. HopZ3\_C300A. **Red shading**: significant (>50%) increase of acetylation with HopZ3. **Blue shading**: significant decrease of phosphorylation *in planta* in the presence of HopZ3. Residues important for PTO signaling or interaction with AvrPto are in **bold**. + indicates phosphorylation found in a recombinant protein (*in vitro*) or *in planta*. Z3: acetylation found only in PTO treated or co-expressed with HopZ3 and not HopZ3\_C300A.; Ac: acetylation; Phos: phosphorylation; exp: experiment. \*Some spectra do not distinguish these 2 close residues. #*In planta* sites with acetylation above 25% in the presence of HopZ3.
