# Supplementary material for: Pseudomonas syringae effector HopZ3 suppresses the bacterial AvrPto1–tomato PTO immune complex via acetylation
Source: PubMed Central journal article supplement (PMC8584673; doi:10.1371/journal.ppat.1010017), 2021-11-01
Supplement: ppat.1010017.s012.pdf [file ppat.1010017.s012.pdf]

**S3 Table. SIRIN4s PTMs *in vitro*.**

| Protein  | Site | Ac Z3/CA | Phos |   |
|----------|------|----------|------|---|
| SIRIN4_1 | S88  | Z3       |      |   |
|          | T128 | Z3       |      |   |
|          | S153 | Z3       |      |   |
|          | K167 | 1.4      |      |   |
|          | S188 |          |      | + |
|          | S207 | 1.4      |      |   |
|          | K248 | Z3       |      |   |
| SIRIN4_2 | T18  |          | +    |   |
|          | K34  | 2        |      |   |
|          | S144 |          | +    |   |
|          | S180 |          | +    |   |
|          | T185 |          | +    |   |
|          | K210 | 3        |      |   |
| SIRIN4_3 | K48  | Z3       |      |   |
|          | K114 | Z3       |      |   |
|          | S213 |          |      | + |
|          | T239 |          |      | + |
|          | T276 |          |      | + |
|          | S284 |          |      | + |

PTMs were determined using purified recombinant SIRIN4s after *in vitro* <sup>13</sup>C-acetylation by HopZ3/HopZ3\_C300A. Numbers indicate enrichment (fold change) of <sup>13</sup>C-acetylation in the presence of HopZ3 vs. HopZ3\_C300A. Z3: acetylation found only in SIRIN4 treated with HopZ3. **Red shading:** significant (>50%) increase of modification with HopZ3. + indicates phosphorylation found in a recombinant protein. Ac: acetylation; Phos: phosphorylation.
