# Supplementary material for: Pseudomonas syringae effector HopZ3 suppresses the bacterial AvrPto1–tomato PTO immune complex via acetylation
Source: PubMed Central journal article supplement (PMC8584673; doi:10.1371/journal.ppat.1010017), 2021-11-01
Supplement: ppat.1010017.s013.pdf [file ppat.1010017.s013.pdf]

**S4 Table. SIRIPK PTMs *in vitro*.**

| Site    | Ac Z3/CA | Phos |
|---------|----------|------|
| S10     | 1.4      | +    |
| K17     | Z3       |      |
| S31     |          | +    |
| H38/H39 | Z3       |      |
| S44     |          | +    |
| S47     |          | +    |
| S52     |          | +    |
| S56     |          | +    |
| T82     | 2        | +    |
| S83     | 1.6      | +    |
| S86/S87 |          | +    |
| K120    | Z3       |      |
| H130    | 2        |      |
| T135    | 2        | +    |
| S182    | 1.4      | +    |
| S219    | 1.5      | +    |
| S232    |          | +    |
| T246    | 1.8      | +    |
| H247    | 2.2      |      |
| S249    | Z3       | +    |
| T250    | Z3       | +    |
| T255    | 1.6      | +    |
| H256    | 1.8      |      |
| T266    |          | +    |
| S330    |          | +    |
| T354    |          | +    |
| S382    |          | +    |
| T389    |          | +    |
| T396    |          | +    |
| S444    |          | +    |
| T446    |          | +    |
| T452    |          | +    |

PTMs were determined using purified recombinant SIRIPK after *in vitro*  $^{13}\text{C}$ -acetylation by HopZ3/HopZ3\_C300A. Numbers indicate enrichment (fold change) of  $^{13}\text{C}$ -acetylation in the presence of HopZ3 vs. HopZ3\_C300A. Z3: acetylation found only in SIRIPK treated with HopZ3. **Red shading:** significant (>50%) increase of modification with HopZ3. + indicates phosphorylation found in a recombinant protein. Ac: acetylation; Phos: phosphorylation.
