# Supplementary material for: Pseudomonas syringae effector HopZ3 suppresses the bacterial AvrPto1–tomato PTO immune complex via acetylation
Source: PubMed Central journal article supplement (PMC8584673; doi:10.1371/journal.ppat.1010017), 2021-11-01
Supplement: ppat.1010017.s014.pdf [file ppat.1010017.s014.pdf]

**S5 Table. Bacterial and yeast strains.**

| Strain                           | Description                                                                                                                                                                                                                          | Antibiotic <sup>a</sup>           | Reference/<br>Source |
|----------------------------------|--------------------------------------------------------------------------------------------------------------------------------------------------------------------------------------------------------------------------------------|-----------------------------------|----------------------|
| <i>Escherichia coli</i>          |                                                                                                                                                                                                                                      |                                   |                      |
| DH5α                             | F- Φ80d <i>lacZ</i> Δ <i>M15</i> Δ( <i>lacZYA-argF</i> ) <i>U169 endA1 recA1 hsdR17</i> (r <sub>K</sub> <sup>-</sup> m <sub>K</sub> <sup>+</sup> ) <i>deoR thi-1 supE44 λ- gyrA96 relA1</i>                                          | Nal <sup>R</sup>                  | Invitrogen           |
| BL21 (DE3)                       | F- <i>ompT gal dcm lon hsdS<sub>B</sub></i> (r <sub>B</sub> <sup>-</sup> m <sub>B</sub> <sup>-</sup> ) λ(DE3 [ <i>lacI lacUV5-T7 gene 1 ind1 sam7 nin5</i> ])                                                                        |                                   | Stratagene           |
| <i>Saccharomyces cerevisiae</i>  |                                                                                                                                                                                                                                      |                                   |                      |
| AH109                            | MAT <sub>α</sub> , <i>trp1-901, leu2-3, 112, ura3-52, his3-200, gal4Δ, gal80Δ, LYS2::GAL1<sub>UAS</sub>-GAL1<sub>TATA</sub>-HIS3, GAL2<sub>UAS</sub>-GAL2<sub>TATA</sub>-ADE2, URA3::MEL1<sub>UAS</sub>-MEL1<sub>TATA</sub>-lacZ</i> |                                   | Clontech             |
| Y187                             | MAT <sub>α</sub> , <i>ura3-52, his3-200, ade2-101, trp1-901, leu2-3, 112, gal4Δ, met-, gal80Δ, MEL1, URA3::GAL1<sub>USA</sub>-GAL1<sub>TATA</sub>-lacZ</i>                                                                           |                                   | Clontech             |
| <i>Pseudomonas syringae</i>      |                                                                                                                                                                                                                                      |                                   |                      |
| <i>PsyB728a</i>                  | <i>Pseudomonas syringae</i> pv. <i>syringae</i> B728a                                                                                                                                                                                | Rif <sup>R</sup>                  | [1]                  |
| <i>PsyB728a ΔhopZ3</i>           | HopZ3 knock-out mutant of <i>Pseudomonas syringae</i> pv. <i>syringae</i> B728a                                                                                                                                                      | Rif <sup>R</sup>                  | [1]                  |
| <i>PsyB728a ΔAvrPto1</i>         | AvrB3 knock-out mutant of <i>Pseudomonas syringae</i> pv. <i>syringae</i> B728a                                                                                                                                                      | Rif <sup>R</sup>                  | This study           |
| <i>PsyB728a ΔHopZ3ΔAvrPto1</i>   | HopZ3/AvrPto1 double knock-out mutant of <i>Pseudomonas syringae</i> pv. <i>syringae</i> B728a                                                                                                                                       | Rif <sup>R</sup>                  | This study           |
| <i>Agrobacterium tumefaciens</i> |                                                                                                                                                                                                                                      |                                   |                      |
| GV3101 (pCH32)                   | Used for <i>Agrobacterium</i> -mediated transient expression in <i>N. benthamiana</i>                                                                                                                                                | Gm <sup>R</sup> /Rif <sup>R</sup> |                      |
| C58C1 (pMP90)                    | Used for <i>Agrobacterium</i> -mediated transient expression in <i>N. benthamiana</i>                                                                                                                                                | Tet <sup>R</sup>                  |                      |

<sup>a</sup> Nal<sup>R</sup>, nalidixic acid resistance; Rif<sup>R</sup>, rifampicin resistance; Gm<sup>R</sup>, gentamycin resistance; Tet<sup>R</sup>, tetracycline resistance.

## References

1. Vinatzer BA, Teitzel GM, Lee MW, Jelenska J, Hotton S, Fairfax K, et al. The type III effector repertoire of *Pseudomonas syringae* pv. *syringae* B728a and its role in survival and disease on host and non-host plants. *Mol Microbiol.* 2006;62(1):26-44. doi: 10.1111/j.1365-2958.2006.05350.x. PubMed PMID: 16942603.
