# Supplementary material for: Pseudomonas syringae effector HopZ3 suppresses the bacterial AvrPto1–tomato PTO immune complex via acetylation
Source: PubMed Central journal article supplement (PMC8584673; doi:10.1371/journal.ppat.1010017), 2021-11-01
Supplement: ppat.1010017.s015.pdf [file ppat.1010017.s015.pdf]

**S6 Table. Plasmid vectors.**

| Plasmid             | Parent vector | Description                                                                                                               | Antibiotic <sup>a</sup>                               | Reference                      |
|---------------------|---------------|---------------------------------------------------------------------------------------------------------------------------|-------------------------------------------------------|--------------------------------|
| pBAV154             | pTA7001       | Gateway-compatible plant expression binary vector ( <i>dex</i> inducible promoter and C-terminal HA-tag)                  | Km <sup>R</sup> / Cm <sup>R</sup> /BASTA <sup>R</sup> | [1]                            |
| pBAV150             | pTA7001       | Gateway-compatible plant expression binary vector ( <i>dex</i> inducible promoter and C-terminal GFP-tag)                 | Km <sup>R</sup> / Cm <sup>R</sup> /BASTA <sup>R</sup> | [1]                            |
| pTA7001             |               | Vector control for <i>Agrobacterium</i>                                                                                   |                                                       | [1]                            |
| pBAV226             | pME6010       | Gateway-compatible <i>P. syringae</i> expression vector ( <i>nptII</i> promoter, low copy plasmid, C-terminal HA-Tag)     | Tet <sup>R</sup> / Cm <sup>R</sup>                    | [1]                            |
| pME6010             |               | Vector control for <i>P. syringae</i>                                                                                     |                                                       | [1]                            |
| pMTN1907            |               | Gateway™ vector for making unmarked deletions in <i>P. syringae</i> . SacB cassette                                       | Tet <sup>R</sup>                                      | [2]                            |
| pDONR207            |               | Gateway™ cloning vector                                                                                                   | Gm <sup>R</sup> / Cm <sup>R</sup>                     | Invitrogen                     |
| pET DUET            |               | T7 promoter, N-terminal His-tag or C-terminal S-tag                                                                       | Amp <sup>R</sup>                                      | Novagen                        |
| pET28a              |               | T7 promoter, N-terminal His-tag and T7-tag, optional C-terminal His-tag                                                   | Km <sup>R</sup>                                       | Novagen                        |
| pGEX 4T-1           |               | tac promoter and N-terminal GST-tag with thrombin cleavage site                                                           | Amp <sup>R</sup>                                      | Amersham/ Pharmacia            |
| pGEX 4T-3 with rTEV | pGEX 4T-3     | tac promoter and N-terminal GST-tag, pGEX 4T-3 with rTEV site                                                             | Amp <sup>R</sup>                                      | from K. Orth (UT Southwestern) |
| pMAL-c5X            |               | tac promoter and N-terminal MBP fusion                                                                                    | Amp <sup>R</sup>                                      | NE BioLabs                     |
| pG005               | pGreen        | BIFC gateway binary vector 35S promoter, GW, YFP N-terminus                                                               | Sp <sup>R</sup> / Cm <sup>R</sup> /Hyg <sup>R</sup>   | NASC                           |
| pG006               | pGreen        | BIFC gateway binary vector, 35S promoter, GW, YFP C-terminus                                                              | Sp <sup>R</sup> / Cm <sup>R</sup> /Hyg <sup>R</sup>   | NASC                           |
| pLaw10              | pGBK T7       | Yeast two-hybrid GAL4 BD vector, ADH1 promoter, N-terminal c-Myc tag. Gateway compatible derivative of pGBKT7 (Clontech). | Km <sup>R</sup> / Cm <sup>R</sup> TRP                 | [3]                            |
| pLaw11              | pGAD7         | Yeast two-hybrid GAL4 AD vector, ADH1 promoter, N-terminal HA tag. Gateway compatible derivative of pGADT7 (Clontech).    | Amp <sup>R</sup> / Cm <sup>R</sup> /LEU               | [3]                            |

<sup>a</sup> Amp<sup>R</sup>, ampicillin resistance; BASTA<sup>R</sup>, BASTA (glufosinate ammonium) resistance; Cm<sup>R</sup>, chloramphenicol resistance; Gm<sup>R</sup>, gentamycin resistance; Hyg<sup>R</sup>, Hygromycin resistance; Km<sup>R</sup>, kanamycin resistance; Tet<sup>R</sup>, tetracycline resistance; Sp<sup>R</sup>, spectinomycin resistance.

## References

1. Vinatzer BA, Teitzel GM, Lee MW, Jelenska J, Hotton S, Fairfax K, et al. The type III effector repertoire of *Pseudomonas syringae* pv. *syringae* B728a and its role in survival and disease on host and non-host plants. *Mol Microbiol.* 2006;62(1):26-44. doi: 10.1111/j.1365-2958.2006.05350.x. PubMed PMID: 16942603.
2. Baltrus DA, Nishimura MT, Dougherty KM, Biswas S, Mukhtar MS, Vicente J, et al. The molecular basis of host specialization in bean pathovars of *Pseudomonas syringae*. *Mol Plant Microbe Interact.* 2012;25(7):877-88. doi: 10.1094/MPMI-08-11-0218. PubMed PMID: 22414441.
3. Lee J, Manning AJ, Wolfgeher D, Jelenska J, Cavanaugh KA, Xu H, et al. Acetylation of an NB-LRR plant immune-effector complex suppresses immunity. *Cell Rep.* 2015;13(8):1670-82. doi: 10.1016/j.celrep.2015.10.029. PubMed PMID: 26586425.
