# Supplementary material for: Pseudomonas syringae effector HopZ3 suppresses the bacterial AvrPto1–tomato PTO immune complex via acetylation
Source: PubMed Central journal article supplement (PMC8584673; doi:10.1371/journal.ppat.1010017), 2021-11-01
Supplement: ppat.1010017.s016.pdf [file ppat.1010017.s016.pdf]

**S7 Table. PCR primer sequences used in this study.**

| Primer name                          | Primer sequence (5'→3')                              |
|--------------------------------------|------------------------------------------------------|
| AvrPto1 <sub>Psy</sub> 5'F1          | AAAAAGCAGGCTTCAACTGGTTGCGCAAGACTGA                   |
| AvrPto1 <sub>Psy</sub> 5'R1          | TACGGTGCACATATATTTCCCATTCGTATACCC                    |
| AvrPto1 <sub>Psy</sub> 3'F2          | AATATATGTCGCACCGTAACTGGTAATGA                        |
| AvrPto1 <sub>Psy</sub> 3'R2          | AGAAAGCTGGGTCTACAGCGACATGCTGGAAC                     |
| PTO-EcoRI-F                          | GGGAATCATGGGAAGCAAGTATTCTAA                          |
| PTO-Sall-R                           | AGCTTGTGACAATAACAGACTCTTGGAGAC                       |
| PTO T204R-F                          | GTGAAAGGA <u>AG</u> ACTCGGCTAC                       |
| PTO T204R-R                          | GTAGCCGAGTCTTCCTTTTAC                                |
| PTO T204N-F                          | GTGAAAGGAAATCTCGGCTAC                                |
| PTO T204N-R                          | GTAGCCGAGATTTCCTTTTAC                                |
| FEN-EcoRI-F                          | GGGAATTCATGGGAAGCAAGTATTCC                           |
| FEN-Sall-R                           | AGCTTGTGACGTTTCAGGATCATCTTGAATGG                     |
| FEN N202T-F                          | ACAGTAGTGAGAGGA <u>ACT</u> ATAGGCTACATTGCC           |
| FEN N202T-R                          | GGCAATGTAGCCTAT <u>AGT</u> TCCTCTCACTACTGT           |
| AvrPto1 <sub>Psy</sub> -EcoRI-F      | CCGAATTCGATGGGAAATATATGTGTC                          |
| AvrPto1 <sub>Psy</sub> -Sall-R       | CTTGTGACCCAGTTACGGTGC GGCT                           |
| AvrPto1 <sub>Psy</sub> T91A-F        | CAGCATAGGTTTCATG <u>GCG</u> GGAGCGTCAGGA             |
| AvrPto1 <sub>Psy</sub> T91A-R        | TCCTGACGCTCCCGCCATGAACCTATGCTG                       |
| AvrPto1 <sub>Psy</sub> H125A/H130A-F | GAAGCTCTGCAG <u>GCCG</u> CAATGGGTATCGCCGCTGACATCCCA  |
| AvrPto1 <sub>Psy</sub> H125A/H130A-R | TGGGATGTCAG <u>GCG</u> GATACCCATTGCGGCCTGCAGAGCTTC   |
| SIRIPK-Sall-F                        | CGGGTCGACATGGCTACTTGC GGAATTGACT                     |
| SIRIPK-Not1-R                        | GGGCGGCCGCTATAAGAATTTAGTTTGTTTG                      |
| SIRIN4-1-BamHI-F                     | GTGGATCCGATGGCTCGTCCAAATGTCCC                        |
| SIRIN4-1-XhoI-R                      | CCGGCTCGAGTTACCAGGGACAACAACACC                       |
| SIRIN4-2-BamHI-F                     | GTGGATCCGATGGCTCGTGCAAATGTG                          |
| SIRIN4-2-XhoI-R                      | CCGCTCGAGTCACCACAAAGGAAAGCA                          |
| SIRIN4-3-BamHI-F                     | GTGGATCCGATGGCAAACACTCACAA                           |
| SIRIN4-3-XhoI-R                      | CCGCTCGAGTCAATCCGACCCCATGGGAAACAT                    |
| AvrPto1 <sub>Psy</sub> -DONR-F       | GGGGACAAGTTTGTACAAAAAAGCAGGCTTCATGGGAAATATATGTGTCGGC |
| AvrPto1 <sub>Psy</sub> -DONR-R       | GGGACCACTTTGTACAAGAAAGCTGGGTCCCAGTTACGGTGC GGGCTAGG  |
| PTO-DONR-F                           | AAAAAGCAGGCTTCATGGGAAGCAAGTATTCTAA                   |
| PTO-DONR-R                           | AGAAAGCTGGGTCAATAACAGACTCTTGGAGAC                    |
| FEN-DONR-F                           | AAAAAGCAGGCTTCATGGGAAGCAAGTATTCC                     |
| FEN-DONR-R                           | AGAAAGCTGGGTCTTCAGGATCATCTTGAATGG                    |
| SIRIPK-DONR-F                        | AAAAAGCAGGCTTCATGGCTACTTGC GGAATTGACT                |
| SIRIPK-DONR-R                        | AGAAAGCTGGGTCCATAAGAATTTAGTTTGTTTG                   |
| SIRIN4-1-DONR-F                      | AAAAAGCAGGCTATGGCTCGTCCAAATGTCCC                     |
| SIRIN4-1-DONR-R                      | AGAAAGCTGGGTCCCAGGGACAACAACACCA                      |
| SIRIN4-2-DONR-F                      | AAAAAGCAGGCTATGGCTCGTGCAAATGTG                       |
| SIRIN4-2-DONR-R                      | AGAAAGCTGGGTCCCACAAAGGAAAGCAGCA                      |
| SIRIN4-3-DONR-F                      | AAAAAGCAGGCTATGGCAAACACTCACAA                        |
| SIRIN4-3-DONR-R                      | AGAAAGCTGGGTCACTCCGACCCCATGGGAA                      |

Mutated codons are underlined.
